# Supplementary material for: Diabetic polyneuropathy and pain, prevalence, and patient characteristics: a cross-sectional questionnaire study of 5,514 patients with recently diagnosed type 2 diabetes
Source: PubMed Central journal article supplement — Pain. 2019 Nov 4;161(3):574–83. doi: 10.1097/j.pain.0000000000001744 (PMC7017941; doi:10.1097/j.pain.0000000000001744), 2019-11-04
Supplement: jop-161-574-s001.pdf [file jop-161-574-s001.pdf]

## **Diabetic polyneuropathy and pain, prevalence, and patient characteristics: A cross-sectional questionnaire study of 5,514 patients with early type 2 diabetes.**

### **Authors:**

Sandra Sif Gylfadottir<sup>a,b\*</sup>, Diana Hedevang Christensen<sup>a,c\*</sup>, Sia Kromann Nicolaisen<sup>c</sup>, Henning Andersen<sup>a,d</sup>, Brian Christopher Callaghan<sup>a,e</sup>, Mustapha Itani<sup>a,f</sup>, Karolina Snopek Khan<sup>a,b,d</sup>, Alexander Gramm Kristensen<sup>a,b,g</sup>, Jens Steen Nielsen<sup>h</sup>, Søren Hein Sindrup<sup>a,f</sup>, Niels Trolle Andersen<sup>i</sup>, Troels Staehelin Jensen<sup>a,b,d</sup>, Reimar Wernich Thomsen<sup>c\*\*</sup>, Nanna Brix Finnerup<sup>a,b,d\*:\*</sup>

### **Author affiliations:**

<sup>a</sup>The International Diabetic Neuropathy Consortium (IDNC), Department of Clinical Medicine, Faculty of Health, Aarhus University, Aarhus, Denmark

<sup>b</sup>Danish Pain Research Center, Department of Clinical Medicine, Aarhus University, Aarhus, Denmark

<sup>c</sup>Department of Clinical Epidemiology, Aarhus University Hospital, Aarhus, Denmark

<sup>d</sup>Department of Neurology, Aarhus University Hospital, Aarhus, Denmark

<sup>e</sup>Department of Neurology, University of Michigan, Ann Arbor, USA

<sup>f</sup>Department of Neurology, Odense University Hospital, Odense, Denmark

<sup>g</sup>Department of Clinical Neurophysiology, Aarhus University Hospital, Aarhus, Denmark

<sup>h</sup>Danish Center for Strategic Research in Type 2 Diabetes, Steno Diabetes Center Odense, Odense, Denmark.

<sup>i</sup>Biostatistics, Department of Public Health, Aarhus University, Aarhus, Denmark

## Supplementary Digital Content

**Supplementary Table 1:** *Full version of the questionnaire.*

**Supplementary Table 2:** *Age, gender, and diabetes duration among non-responders.*

**Supplementary Table 3:** *Prevalence of possible DPN (defined by  $MNSIq \geq 4$ ) and possible painful DPN (defined by  $DN4 \geq 3$  + pain location in both feet) with 95% confidence intervals according to gender and age-groups.*

**Supplementary Table 4:** *Prevalence of possible DPN (defined by  $MNSIq \geq 4$ ) and possible painful DPN (defined by  $DN4 \geq 3$  + pain location in both feet) with 95% confidence intervals in total and according to questionnaire interval.*

**Supplementary Table 5:** *The difference between the estimates for possible DPN (defined by  $MNSIq$ ) and possible painful (defined by  $DN4$  and pain location in both feet) with corresponding 95% confidence intervals.*

**Supplementary Table 6:** *The association between neuropathy and a) quality of life, b) depression, c) sleep and d) anxiety among the 5,249 patients with sufficient information to determine status of both possible DPN (defined by  $MNSIq$ ) and possible painful DPN (defined by  $DN4$  and pain location in both feet). Sensitivity analysis – without adjustment for BMI.*

**Supplementary Figure 1:** *Frequency of “yes” responses to the  $MNSIq$  by the 4 possible neuropathy groups among the 5,249 patients with information on status of both DPN (defined by  $MNSIq$ ) and painful DPN (defined by  $DN4$  and pain location in both feet).*

**Supplementary Figure 2:** *The association of DPN and painful DPN with sleep disturbance – an example.*

**Supplementary Table 1: Questionnaire, full version**

**HEIGHT**

1. Enter your height in centimetres: \_\_\_\_\_ cm

**WEIGHT**

2. Enter your weight in kilograms: \_\_\_\_\_ kg

**SMOKING**

3. Please tick the relevant item:

- Never smoked
- Ex-smoker (stopped more than 6 months ago)
- Smokes occasionally
- Smokes daily

**ALCOHOL INTAKE**

4. Please tick the relevant item:

- Less than 7 units per week (women)/14 units (men) per week
- More than 7 units per week (women)/14 units (men) per week

**PHYSICAL ACTIVITY**

5. How many days a week are you **physically active for at least 30 minutes per day**? One tick only.  
(this includes moderate or hard physical activity with increased breathing, muscles exercise and use of strength, eg, recreational sports or competitive sports, heavy gardening, brisk walking, biking at moderate or fast pace or physically strenuous work. Both spare time and work activities are to be included)

| Never                    | 1 day                    | 2 days                   | 3 days                   | 4 days                   | 5 days                   | 6 days                   | 7 days                   |
|--------------------------|--------------------------|--------------------------|--------------------------|--------------------------|--------------------------|--------------------------|--------------------------|
| <input type="checkbox"/> |

**PHYSICAL ACTIVITY - continued**

6. Do you engage in physical activity in your spare time, or participate in other activities that involve exercise?

- Yes       No

7. Physical activity in your spare time in the past year. Tick off the box that best describes your level of activity:

- Exercising strenuously and practicing competitive sports regularly and several times a week
- Practising recreational sports or doing heavy gardening or similar at least 4 hours a week
- Walking, biking or other light exercise at least 4 times per week (Sunday strolls, light gardening and biking/walking to work should also be included)
- Reading, watching TV or other sedentary activity

**WALKING/FALLS**

8. Do you sometimes feel unsteady when walking?

- Yes       No

9. Have you fallen in the past year?

- Yes       No

If yes, how many times have you fallen in the past year?

- Once                       2-4 times                       More than 4 times

10. Has your fall/falls made it necessary to contact your general practitioner?

- Yes       No

11. Has your fall/falls made it necessary to contact the hospital

- Yes       No

**QUALITY OF LIFE**

12. How will you rate your quality of life in the past 7 days? (one tick only)

0      1      2      3      4      5      6      7      8      9      10

- 

Worst possible quality of life

Best possible quality of life

**SLEEP**

13. How was your sleep quality in **the past 7 days**?

Please respond to each item by marking one box per row.

| In the past 7 days... | Very poor                | Poor                     | Fair                     | Good                     | Very good                |
|-----------------------|--------------------------|--------------------------|--------------------------|--------------------------|--------------------------|
| My sleep quality was  | <input type="checkbox"/> |

| In the past 7 days...           | Not at all               | A little bit             | Somewhat                 | Quite a bit              | Very much                |
|---------------------------------|--------------------------|--------------------------|--------------------------|--------------------------|--------------------------|
| I had difficulty falling asleep | <input type="checkbox"/> |
| My sleep was refreshing         | <input type="checkbox"/> |
| I had a problem with sleep      | <input type="checkbox"/> |

© 2008-2016 PROMIS Health Organization and PROMIS Cooperative Group

**MENTAL HEALTH**

14. How was your mental health in **the past 7 days**?

Please respond to each statement by marking one box per row.

| In the past 7 days...                                      | Never                    | Rarely                   | Sometimes                | Often                    | Always                   |
|------------------------------------------------------------|--------------------------|--------------------------|--------------------------|--------------------------|--------------------------|
| I felt uneasy                                              | <input type="checkbox"/> |
| My worries overwhelmed me                                  | <input type="checkbox"/> |
| I felt fearful                                             | <input type="checkbox"/> |
| I found it hard to focus on anything other than my anxiety | <input type="checkbox"/> |
| I have felt worthless                                      | <input type="checkbox"/> |
| I have felt helpless                                       | <input type="checkbox"/> |
| I have felt depressed                                      | <input type="checkbox"/> |
| I have felt hopeless                                       | <input type="checkbox"/> |

© 2008-2016 PROMIS Health Organization and PROMIS Cooperative Group

## FEELING IN YOUR LEGS AND FEET

Please answer the following questions about the feeling in **your legs and feet**.

Check yes or no based on how you usually feel.

|                                                                                                  | Yes                      | No                       |
|--------------------------------------------------------------------------------------------------|--------------------------|--------------------------|
| 15. Are your legs and/or feet numb?                                                              | <input type="checkbox"/> | <input type="checkbox"/> |
| 16. Do you ever have any burning pain in your legs and/or feet?                                  | <input type="checkbox"/> | <input type="checkbox"/> |
| 17. Are your feet too sensitive to touch?                                                        | <input type="checkbox"/> | <input type="checkbox"/> |
| 18. Do you get muscle cramps in your legs and/or feet ?                                          | <input type="checkbox"/> | <input type="checkbox"/> |
| 19. Do you ever have any prickling feelings in your legs or feet ?                               | <input type="checkbox"/> | <input type="checkbox"/> |
| 20. Does it hurt when the bed covers touch your skin?                                            | <input type="checkbox"/> | <input type="checkbox"/> |
| 21. When you get into the tub or shower, are you able to tell the hot water from the cold water? | <input type="checkbox"/> | <input type="checkbox"/> |
| 22. Have you ever had an open sore on your foot?                                                 | <input type="checkbox"/> | <input type="checkbox"/> |
| 23. Has your doctor ever told you that you have diabetic neuropathy?                             | <input type="checkbox"/> | <input type="checkbox"/> |
| 24. Do you feel weak all over most of the time?                                                  | <input type="checkbox"/> | <input type="checkbox"/> |
| 25. Are your symptoms worse at night?                                                            | <input type="checkbox"/> | <input type="checkbox"/> |
| 26. Do your legs hurt when you walk?                                                             | <input type="checkbox"/> | <input type="checkbox"/> |
| 27. Are you able to sense your feet when you walk?                                               | <input type="checkbox"/> | <input type="checkbox"/> |
| 28. Is the skin on your feet so dry that it cracks open ?                                        | <input type="checkbox"/> | <input type="checkbox"/> |
| 29. Have you ever had an amputation?                                                             | <input type="checkbox"/> | <input type="checkbox"/> |

**PAIN**

30. Do you have constant or recurring pain?

- Yes       No

If yes, have had any of these types of pain in the past 3 months? (tick all that apply)

- Headache or facial pain
- Back pain, including low back pain and neck pain
- Shoulder pain
- Pain in the hands/arms
- Abdominal pain
- Pain in the legs
- Other pain (please note what kind of pain) \_\_\_\_\_

31. Do you have constant or recurring pain **in your feet**

- Yes       No

**If you have answered YES to question 31, please continue answering the rest of the questionnaire. The remaining questions are about pain in your feet.**

**If you have answered NO to questions 31, we thank you for your participation and kindly ask you to return the questionnaire in the attached reply envelope.**

32. Do you have pain in both feet?

- Yes       No

33. Does the pain spread up your legs?

- Yes       No

34. Do you have similar pain in your fingers/hands?

- Yes       No

35. Do you wake up a nights due to pain in your feet?

- Yes       No

|                                              |                          |                          |                                          |                          |                          |
|----------------------------------------------|--------------------------|--------------------------|------------------------------------------|--------------------------|--------------------------|
| 36. How long have you had pain in your feet? | Less than a month        | 1-3 months               | More than 3 months, but less than a year | 1-5 years                | More than 5 years        |
|                                              | <input type="checkbox"/> | <input type="checkbox"/> | <input type="checkbox"/>                 | <input type="checkbox"/> | <input type="checkbox"/> |

|                                                                                                                                             |                          |                          |                          |                          |                          |                          |                          |                          |                          |                          |                     |
|---------------------------------------------------------------------------------------------------------------------------------------------|--------------------------|--------------------------|--------------------------|--------------------------|--------------------------|--------------------------|--------------------------|--------------------------|--------------------------|--------------------------|---------------------|
| 37. Please rate your pain intensity by marking the number that best describes your pain on average in your feet <b>in the past 24 hours</b> |                          |                          |                          |                          |                          |                          |                          |                          |                          |                          |                     |
| 0                                                                                                                                           | 1                        | 2                        | 3                        | 4                        | 5                        | 6                        | 7                        | 8                        | 9                        | 10                       |                     |
| <input type="checkbox"/>                                                                                                                    | <input type="checkbox"/> | <input type="checkbox"/> | <input type="checkbox"/> | <input type="checkbox"/> | <input type="checkbox"/> | <input type="checkbox"/> | <input type="checkbox"/> | <input type="checkbox"/> | <input type="checkbox"/> | <input type="checkbox"/> |                     |
| No pain                                                                                                                                     |                          |                          |                          |                          |                          |                          |                          |                          |                          |                          | Worst possible pain |

|                                                                                                                                           |                          |                          |                          |                          |                          |                          |                          |                          |                          |                          |                     |
|-------------------------------------------------------------------------------------------------------------------------------------------|--------------------------|--------------------------|--------------------------|--------------------------|--------------------------|--------------------------|--------------------------|--------------------------|--------------------------|--------------------------|---------------------|
| 38. Please rate your pain intensity by marking the number that best describes your pain on average in your feet <b>in the past 7 days</b> |                          |                          |                          |                          |                          |                          |                          |                          |                          |                          |                     |
| 0                                                                                                                                         | 1                        | 2                        | 3                        | 4                        | 5                        | 6                        | 7                        | 8                        | 9                        | 10                       |                     |
| <input type="checkbox"/>                                                                                                                  | <input type="checkbox"/> | <input type="checkbox"/> | <input type="checkbox"/> | <input type="checkbox"/> | <input type="checkbox"/> | <input type="checkbox"/> | <input type="checkbox"/> | <input type="checkbox"/> | <input type="checkbox"/> | <input type="checkbox"/> |                     |
| No pain                                                                                                                                   |                          |                          |                          |                          |                          |                          |                          |                          |                          |                          | Worst possible pain |

|                                                                           |                                                                                                |                             |
|---------------------------------------------------------------------------|------------------------------------------------------------------------------------------------|-----------------------------|
| 39. Do you take pain medication for the pain in your feet?                |                                                                                                |                             |
| <input type="checkbox"/> Yes, daily                                       | <input type="checkbox"/> Yes, but not daily                                                    | <input type="checkbox"/> No |
| If yes, what kind of pain medication (tick more than one box if relevant) |                                                                                                |                             |
| <input type="checkbox"/> Over-the-counter medicine                        | <input type="checkbox"/> Prescription medicine (medicine that has been prescribed by a doctor) |                             |

|                                                                                                                                                                 |                          |                          |                          |                          |                          |
|-----------------------------------------------------------------------------------------------------------------------------------------------------------------|--------------------------|--------------------------|--------------------------|--------------------------|--------------------------|
| 40. The following questions are about how the pain in your feet interferes with your daily life.<br>Please respond to each question by marking one box per row. |                          |                          |                          |                          |                          |
| <b>In the past 7 days...</b>                                                                                                                                    | Not at all               | A little bit             | Somewhat                 | Quite a bit              | Very much                |
| How much did pain interfere with your day to day activities?                                                                                                    | <input type="checkbox"/> |
| How much did pain interfere with work around the house?                                                                                                         | <input type="checkbox"/> |
| How much did pain interfere with your ability to participate in social activities?                                                                              | <input type="checkbox"/> |



How much did pain interfere with your household chores?

© 2008-2016 PROMIS Health Organization and PROMIS Cooperative Group

41. Please answer the following questions about the characteristics of the pain in your feet by marking one box per row.

Does the pain have one or more of the following characteristics?

|                 | Yes                      | No                       |
|-----------------|--------------------------|--------------------------|
| Burning         | <input type="checkbox"/> | <input type="checkbox"/> |
| Painful cold    | <input type="checkbox"/> | <input type="checkbox"/> |
| Electric shocks | <input type="checkbox"/> | <input type="checkbox"/> |

Is the pain associated with one or more of the following symptoms in the same area?

|                  | Yes                      | No                       |
|------------------|--------------------------|--------------------------|
| Tingling         | <input type="checkbox"/> | <input type="checkbox"/> |
| Pins and needles | <input type="checkbox"/> | <input type="checkbox"/> |
| Numbness         | <input type="checkbox"/> | <input type="checkbox"/> |
| Itching          | <input type="checkbox"/> | <input type="checkbox"/> |

DN4© 2005. Bouhassira D. All rights reserved.

| <b>Supplementary Table 2: Age, gender, and diabetes duration among responders and non-responders</b>                                                                                                                                                                                                 |                             |                         |
|------------------------------------------------------------------------------------------------------------------------------------------------------------------------------------------------------------------------------------------------------------------------------------------------------|-----------------------------|-------------------------|
|                                                                                                                                                                                                                                                                                                      | Non-responders <sup>a</sup> | Responders <sup>b</sup> |
| Age, mean (SD)                                                                                                                                                                                                                                                                                       | 59.6 (12.8)                 | 64.1 (10.9)             |
| Female gender, n(%)                                                                                                                                                                                                                                                                                  | 495 (40.8)                  | 2,355 (42,7)            |
| Diabetes duration, median (IQR)                                                                                                                                                                                                                                                                      | 4.6 (3.4-5.9)               | 4.6 (3.5-5.7)           |
| <sup>a</sup> N = 1212: The 971, who never returned a questionnaire + the 225 who returned a blank questionnaire + the 16 who returned multiple questionnaires and were excluded (diabetes duration, n = 1,203)<br><sup>b</sup> N = 5,514: Those, who returned a fully or partly filled questionnaire |                             |                         |

**Supplementary Table 3:** Prevalence of possible DPN (defined by MNSIq $\geq$ 4) and possible painful DPN (defined by DN4 $\geq$ 3 + pain location in both feet) with 95% confidence intervals in total and stratified according to sex and age among all patients (N = 5,514) who returned a filled out questionnaire.

|                                                                                                                                                                      | Possible DPN       |        |                           | Possible Painful DPN |        |                              |
|----------------------------------------------------------------------------------------------------------------------------------------------------------------------|--------------------|--------|---------------------------|----------------------|--------|------------------------------|
|                                                                                                                                                                      | Responses          | Events | Prevalence, %<br>(95% CI) | Responses            | Events | Prevalence, %<br>(95% CI)    |
| Total                                                                                                                                                                | 5,359 <sup>a</sup> | 962    | 18.0 (16.9-19.0)          | 5,372 <sup>b</sup>   | 536    | 10.0 (9.2-10.8) <sup>c</sup> |
| Sex                                                                                                                                                                  |                    |        |                           |                      |        |                              |
| Female                                                                                                                                                               | 2,274              | 503    | 20.2 (18.6-21.9)          | 2,278                | 258    | 11.3 (10.1-12.7)             |
| Male                                                                                                                                                                 | 3,085              | 459    | 16.3 (15.0-17.7)          | 3,094                | 278    | 9.0 (8.0-10.0)               |
| Age, years                                                                                                                                                           |                    |        |                           |                      |        |                              |
| <55                                                                                                                                                                  | 1,129              | 241    | 21.3 (19.0-23.9)          | 1,130                | 124    | 11.0 (9.2-12.9)              |
| 55 - 65                                                                                                                                                              | 1,481              | 194    | 19.9 (17.8-22.0)          | 1,478                | 163    | 11.0 (9.5-12.7)              |
| 65 - 75                                                                                                                                                              | 1,034              | 172    | 16.6 (14.4-19.0)          | 1,034                | 93     | 9.0 (7.3-10.9)               |
| $\geq$ 75                                                                                                                                                            | 1,715              | 255    | 14.9 (13.2-16.6)          | 1,730                | 156    | 9.0 (7.7-10.5)               |
| Abbreviations: MNSIq, Michigan neuropathy screening questionnaire; DPN, diabetic polyneuropathy; DN4, Douleur Neuropathique en 4 Questions, CI, confidence interval. |                    |        |                           |                      |        |                              |
| <sup>a</sup> 5,359 persons had sufficient answers to determine MNSIq-defined DPN status.                                                                             |                    |        |                           |                      |        |                              |
| <sup>b</sup> 5,372 persons had sufficient answers to determine DN4-defined painful DPN status.                                                                       |                    |        |                           |                      |        |                              |
| <sup>c</sup> Including 2.4% (n = 130) with MNSIq <4 and 0.4% (n=20) with unknown MNSIq status.                                                                       |                    |        |                           |                      |        |                              |

**Supplementary Table 4:** Prevalence of possible DPN (defined by MNSIq $\geq$ 4) and possible painful DPN (defined by DN4 $\geq$ 3 + pain location in both feet) with 95% confidence intervals in total and according to questionnaire interval

|                                           | Possible DPN              |                  | Possible Painful DPN      |                 |
|-------------------------------------------|---------------------------|------------------|---------------------------|-----------------|
|                                           | Distribution of responses | % (95% CI)       | Distribution of responses | % (95% CI)      |
| <b>Total</b>                              | 5,359                     | 18.0 (16.9-19.0) | 5,372                     | 10.0 (9.2-10.8) |
| <b>Questionnaire interval<sup>a</sup></b> |                           |                  |                           |                 |
| T1                                        | 4,478                     | 17.8 (16.7-19.0) | 4,482                     | 10.0 (9.1-10.9) |
| T2                                        | 478                       | 17.8 (14.5-21.5) | 488                       | 8.4 (6.1-11.2)  |
| T3                                        | 403                       | 19.4 (15.6-23.6) | 402                       | 11.7 (8.7-15.2) |

Abbreviations: MNSIq, Michigan neuropathy screening questionnaire; DPN, diabetic polyneuropathy; DN4, Douleur Neuropathique en 4 Questions, CI, confidence interval

<sup>a</sup>According to time period: T1: response received in the time interval between first questionnaire and first reminder, T2: response received in the time period from first reminder to second reminder, T3: response received in the time period from second reminder to closure of questionnaire survey.

**Supplementary Table 5.** The difference between the estimates for possible DPN (defined by MNSIq) and possible painful (defined by DN4 and pain location in both feet) with corresponding 95% confidence intervals.

|                             | Quality of Life (NRS 0-10) |                           | Depression T-scores    |                        | Sleep disturbance T-scores |                        | Anxiety T-scores        |                        |
|-----------------------------|----------------------------|---------------------------|------------------------|------------------------|----------------------------|------------------------|-------------------------|------------------------|
|                             | Model 1 <sup>a</sup>       | Model 2 <sup>b</sup>      | Model 1 <sup>a</sup>   | Model 2 <sup>b</sup>   | Model 1 <sup>a</sup>       | Model 2 <sup>b</sup>   | Model 1 <sup>a</sup>    | Model 2 <sup>b</sup>   |
|                             | $\beta$ (95% CI)           | $\beta$ (95% CI)          | $\beta$ (95% CI)       | $\beta$ (95% CI)       | $\beta$ (95% CI)           | $\beta$ (95% CI)       | $\beta$ (95% CI)        | $\beta$ (95% CI)       |
| <b>Possible DPN</b>         | -1.16<br>(-1.31 ; -1.01)** | -0.85<br>(-1.00; -0.71)** | 4.18<br>(3.53; 4.84)** | 2.95<br>(2.30; 3.59)** | 4.65<br>(4.04; 5.27)**     | 3.46<br>(2.86; 4.06)** | 3.97<br>(3.31 ; 4.64)** | 2.82<br>(2.17; 3.48)** |
| <b>Possible Painful DPN</b> | -0.85<br>(-1.04; -0.67)**  | -0.57<br>(-0.76; -0.39)** | 3.35<br>(2.51; 4.18)** | 2.12<br>(1.30; 2.93)** | 2.22<br>(1.44 ; 3.00)**    | 1.05<br>(0.30; 1.81)** | 2.73<br>(1.89; 3.58)**  | 1.61<br>(0.78; 2.44)** |
| <b>Difference, 95% CI</b>   | -0.30<br>(-0.59; -0.01)*   | -0.28<br>(-0.56; 0.00)    | 0.84<br>(-0.45; 2.13)  | 0.83<br>(-0.41; 2.07)  | 2.43<br>(1.21; 3.64)**     | 2.41<br>(1.25; 3.57)** | 1.24<br>(-0.05; 2.55)   | 1.21<br>(-0.05; 2.48)  |

Abbreviations: MNSIq, Michigan neuropathy screening questionnaire; DPN, diabetic polyneuropathy; DN4, Douleur Neuropathique en 4 questions; OR, odds ratio; CI, confidence interval. <sup>a</sup>Model 1: Adjusted for age, sex, diabetes duration, BMI, and DPN or painful DPN, respectively. <sup>b</sup>Model 2: Adjusted for age, sex, diabetes duration, BMI, number of pain locations other than extremities (head/face, lower or upper back, shoulders, stomach, or “other location” [category capturing locations not listed here]), and DPN or painful DPN, respectively.

\*P-value < 0.05, \*\*P-value<0.001

**Supplementary Table 6.** The association between neuropathy and a) quality of life, b) depression, c) sleep and d) anxiety among the 5,249 patients with sufficient information to determine status of both possible DPN (defined by MNSIq) and possible painful DPN (defined by DN4 and pain location in both feet). Sensitivity analysis – without adjustment for BMI.

|                                       | Quality of Life (NRS 0-10) |                           | Depression T-scores    |                        | Sleep disturbance T-scores |                        | Anxiety T-scores        |                        |
|---------------------------------------|----------------------------|---------------------------|------------------------|------------------------|----------------------------|------------------------|-------------------------|------------------------|
|                                       | Model 1 <sup>a</sup>       | Model 2 <sup>b</sup>      | Model 1 <sup>a</sup>   | Model 2 <sup>b</sup>   | Model 1 <sup>a</sup>       | Model 2 <sup>b</sup>   | Model 1 <sup>a</sup>    | Model 2 <sup>b</sup>   |
|                                       | $\beta$ (95% CI)           | $\beta$ (95% CI)          | $\beta$ (95% CI)       | $\beta$ (95% CI)       | $\beta$ (95% CI)           | $\beta$ (95% CI)       | $\beta$ (95% CI)        | $\beta$ (95% CI)       |
| <b>Possible DPN</b>                   | -1.26<br>(-1.40 ; -1.11)** | -0.92<br>(-1.07; -0.78)** | 4.42<br>(3.77; 5.07)** | 3.09<br>(2.46; 3.74)** | 4.75<br>(4.14 ; 5.36)**    | 3.49<br>(2.90; 4.07)** | 4.04<br>(3.38 ; 4.70)** | 2.83<br>(2.18; 3.50)** |
| <b>Possible painful DPN</b>           | -0.86<br>(-1.05 ; -0.67)** | -0.57<br>(-0.76; -0.39)** | 3.37<br>(2.54; 4.20)** | 2.13<br>(1.32; 2.94)** | 2.25<br>(1.48 ; 3.03)**    | 1.09<br>(0.34; 1.85)** | 2.79<br>(1.95 ;3.63)**  | 1.68<br>(0.85; 2.50)** |
| <b>Number of other pain locations</b> |                            |                           |                        |                        |                            |                        |                         |                        |
| <b>1</b>                              | -                          | -0.62<br>(-0.75; -0.49)   | -                      | 1.39<br>(0.81; 1.97)   | -                          | 1.97<br>(1.42; 2.51)   | -                       | 1.29<br>(0.70; 1.88)   |
| <b>2</b>                              | -                          | -1.02<br>(-1.15; -0.88)   | -                      | 3.61<br>(3.00; 4.22)   | -                          | 3.93<br>(3.36; 4.51)   | -                       | 3.47<br>(2.84; 4.09)   |
| <b>3</b>                              | -                          | -1.35<br>(-1.52; -1.19)   | -                      | 5.66<br>(4.93; 6.39)   | -                          | 5.28<br>(4.59; 5.96)   | -                       | 5.15<br>(4.40; 5.89)   |
| <b>4</b>                              | -                          | -1.86<br>(-2.09; -1.62)   | -                      | 7.74<br>(6.69; 8.78)   | -                          | 6.51<br>(5.55; 7.46)   | -                       | 6.88<br>(5.82; 7.94)   |
| <b>5</b>                              | -                          | -1.60<br>(-2.16; -1.03)   | -                      | 8.21<br>(5.80; 10.62)  | -                          | 7.03<br>(4.77; 9.29)   | -                       | 7.40<br>(4.87; 9.93)   |

Abbreviations: MNSIq, Michigan neuropathy screening questionnaire; DPN, diabetic polyneuropathy; DN4, Douleur Neuropathique en 4 questions; OR, odds ratio; CI, confidence interval. <sup>a</sup>Model 1: Adjusted for age, sex, diabetes duration, and DPN or painful DPN, respectively. <sup>b</sup>Model 2: Adjusted for age, sex, diabetes duration, number of pain locations other than extremities (head/face, lower or upper back, shoulders, stomach, or “other location” [category capturing locations not listed here]), and DPN or painful DPN, respectively.

\*\*P-value<0.001

**Supplementary Figure 1:** Frequency of “yes” responses to the MNSIq by the 4 neuropathy groups among the 5,249 patients with information on status of both possible DPN (defined by MNSIq) and possible painful DPN (defined by DN4 and pain location in both feet).

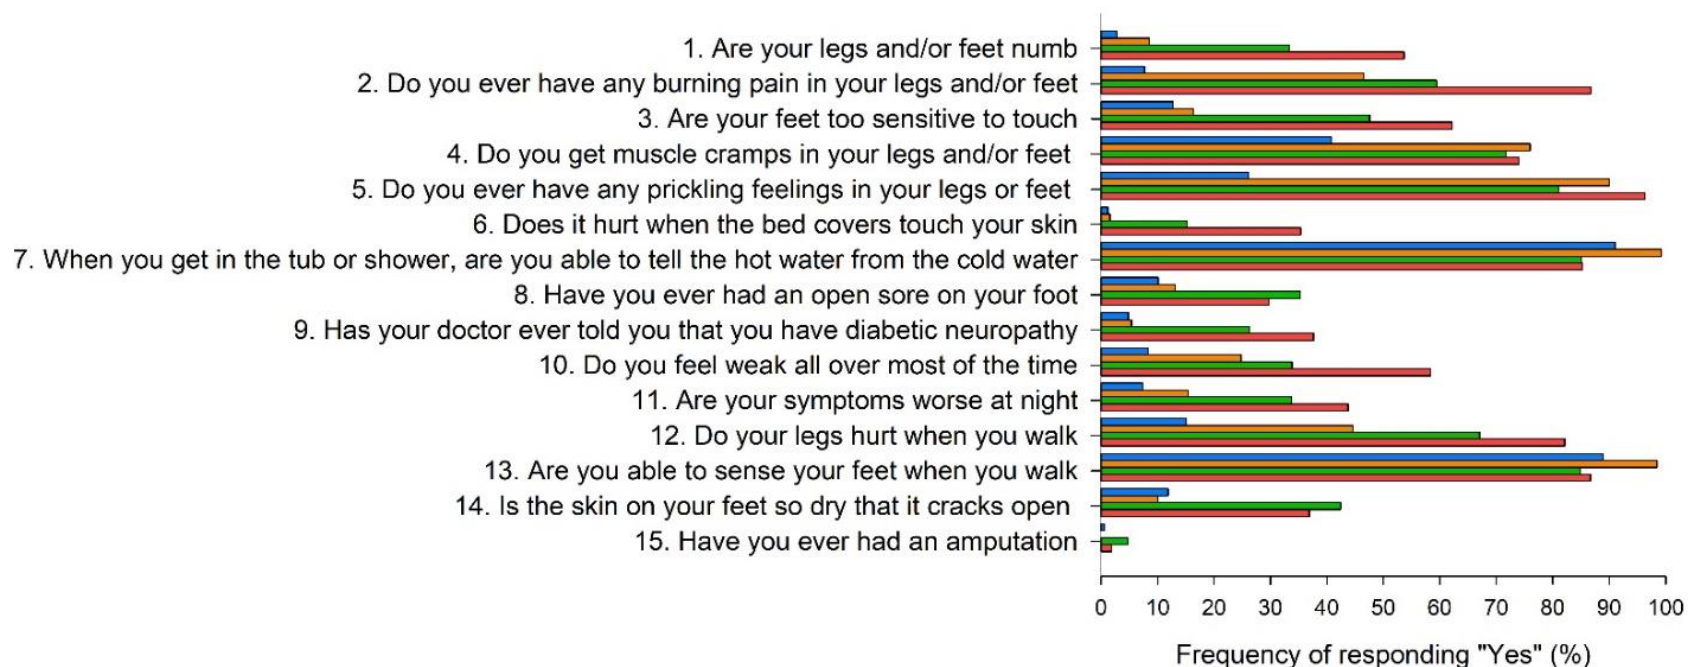

Abbreviations: MNSIq: Michigan Neuropathy Screening Instrument questionnaire, DN4: Douleur Neuropathique en 4 Questions.

Of note: Answering “no” to item 7 and 13 count as 1 point, while answering “yes” to item 1-3, 5-6, 11-12, 14-15 each count as 1 point. Thus, a low frequency of “yes”-responses to item 7 and 13 is associated with a higher likelihood of DPN. Item 4 and 10 are per definition not included in the score.

Blue: MNSIq < 4 / DN4 < 3 or no pain, Orange: MNSIq < 4 / DN4 ≥ 3 and pain, Green: MNSIq ≥ 4 / DN4 < 3 or no pain, Red: MNSIq ≥ 4 / DN4 ≥ 3 and pain

**Supplementary Figure 2:** *The association of possible DPN and possible painful DPN with sleep disturbance – an example*

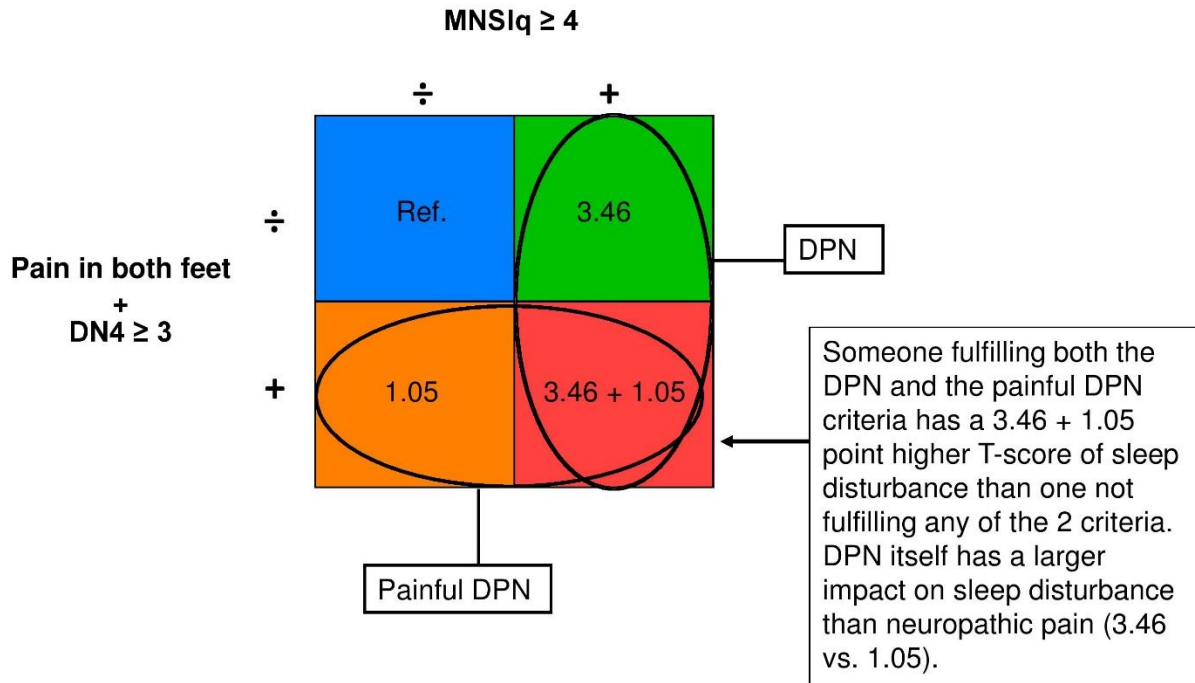

Abbreviations: MNSIq: Michigan Neuropathy Screening Instrument questionnaire, DN4: Douleur Neuropathique en 4 Questions.

The estimates are all found in table 5. All estimates are adjusted for age, gender, diabetes duration, BMI, and pain in other locations than extremities.
